# Supplementary material for: Occupational exposures and mitigation strategies among homeless shelter workers at risk of COVID-19
Source: PubMed Central journal article supplement (PMC8559982; doi:10.1371/journal.pone.0253108), 2021-11-01
Supplement: pone.0253108.s001.pdf [file pone.0253108.s001.pdf]

| Variable            | Question                                                                                                                                                                       | Field Type | Values, Labels                            |
|---------------------|--------------------------------------------------------------------------------------------------------------------------------------------------------------------------------|------------|-------------------------------------------|
| record_id           | Record ID                                                                                                                                                                      | text       |                                           |
| shelter_network     | Shelter Network                                                                                                                                                                | number     |                                           |
| d_cur_smoker        | Do you currently smoke tobacco?                                                                                                                                                | dropdown   | 0, No 1, Yes                              |
| d_past_smoker       | Are you a past smoker?                                                                                                                                                         | dropdown   | 0, No 1, Yes                              |
| d_cur_vape          | Do you currently vape/smoke electronic cigarettes?                                                                                                                             | dropdown   | 0, No 1, Yes                              |
| d_household_num     | How many people live in your household, including yourself?                                                                                                                    | text       |                                           |
| d_flu_vax           | Did you get the flu vaccine (flu shot) this year (i.e., between Oct 2019 to present)?                                                                                          | dropdown   | 0, No 1, Yes                              |
| d_underlying_ill__0 | Do you have any of the following underlying illnesses? (choice=Chronic lung disease (asthma/emphysema/COPD))                                                                   | checkbox   | 0, Unchecked 1, Checked                   |
| d_underlying_ill__1 | Do you have any of the following underlying illnesses? (choice=Diabetes)                                                                                                       | checkbox   | 0, Unchecked 1, Checked                   |
| d_underlying_ill__2 | Do you have any of the following underlying illnesses? (choice=Heart disease)                                                                                                  | checkbox   | 0, Unchecked 1, Checked                   |
| d_underlying_ill__3 | Do you have any of the following underlying illnesses? (choice=Chronic kidney disease)                                                                                         | checkbox   | 0, Unchecked 1, Checked                   |
| d_underlying_ill__4 | Do you have any of the following underlying illnesses? (choice=Chronic liver disease)                                                                                          | checkbox   | 0, Unchecked 1, Checked                   |
| d_underlying_ill__5 | Do you have any of the following underlying illnesses? (choice=Neurologic/neurodevelopmental/intellectual disability)                                                          | checkbox   | 0, Unchecked 1, Checked                   |
| d_underlying_ill__6 | Do you have any of the following underlying illnesses? (choice=Other chronic diseases)                                                                                         | checkbox   | 0, Unchecked 1, Checked                   |
| d_underlying_ill__7 | Do you have any of the following underlying illnesses? (choice=None)                                                                                                           | checkbox   | 0, Unchecked 1, Checked                   |
| d_underlying_ill__8 | Do you have any of the following underlying illnesses? (choice=High Blood Pressure)                                                                                            | checkbox   | 0, Unchecked 1, Checked                   |
| d_immuno_cond       | Do you have an immunosuppressive condition (i.e., a condition that weakens your immune system such as rheumatoid arthritis)?                                                   | dropdown   | 0, No 1, Yes                              |
| d_ht_ft             | What is your height?Feet:                                                                                                                                                      | dropdown   |                                           |
| d_ht_in             | inches:                                                                                                                                                                        | dropdown   |                                           |
| d_wt                | What is your weight (pounds)?                                                                                                                                                  | text       |                                           |
| test_tested         | Have you been tested for COVID-19?                                                                                                                                             | dropdown   | 0, No 1, Yes                              |
| test_times          | How many times were you tested? (Enter up to 10 tests)                                                                                                                         | text       |                                           |
| test_1_loc          | Where did you get access to testing?                                                                                                                                           | dropdown   | 0, Workplace 1, Medical Provider 2, Other |
| test_1_type         | Was it a blood test?                                                                                                                                                           | dropdown   | 0, No 1, Yes                              |
| test_1_symp__0      | In the month before testing or two months after testing, did you have any of the following symptoms? (choice=Cough (new onset or worsening of chronic cough))                  | checkbox   | 0, Unchecked 1, Checked                   |
| test_1_symp__1      | In the month before testing or two months after testing, did you have any of the following symptoms? (choice=Headache)                                                         | checkbox   | 0, Unchecked 1, Checked                   |
| test_1_symp__2      | In the month before testing or two months after testing, did you have any of the following symptoms? (choice=Muscle pain)                                                      | checkbox   | 0, Unchecked 1, Checked                   |
| test_1_symp__3      | In the month before testing or two months after testing, did you have any of the following symptoms? (choice=Fever/feverish)                                                   | checkbox   | 0, Unchecked 1, Checked                   |
| test_1_symp__4      | In the month before testing or two months after testing, did you have any of the following symptoms? (choice=New loss of smell/taste)                                          | checkbox   | 0, Unchecked 1, Checked                   |
| test_1_symp__5      | In the month before testing or two months after testing, did you have any of the following symptoms? (choice=Chills)                                                           | checkbox   | 0, Unchecked 1, Checked                   |
| test_1_symp__6      | In the month before testing or two months after testing, did you have any of the following symptoms? (choice=Difficulty breathing)                                             | checkbox   | 0, Unchecked 1, Checked                   |
| test_1_symp__7      | In the month before testing or two months after testing, did you have any of the following symptoms? (choice=Sore throat)                                                      | checkbox   | 0, Unchecked 1, Checked                   |
| test_1_symp__8      | In the month before testing or two months after testing, did you have any of the following symptoms? (choice=Diarrhea (3 or more loose/looser than normal stools/24hr period)) | checkbox   | 0, Unchecked 1, Checked                   |
| test_1_symp__9      | In the month before testing or two months after testing, did you have any of the following symptoms? (choice=Other)                                                            | checkbox   | 0, Unchecked 1, Checked                   |
| test_1_symp__10     | In the month before testing or two months after testing, did you have any of the following symptoms? (choice=None)                                                             | checkbox   | 0, Unchecked 1, Checked                   |
| test_1_symp_work    | If yes, did you go to work while feeling these symptoms?                                                                                                                       | dropdown   | 0, No 1, Yes                              |
| test_1_symp_care    | Did you seek medical care for your symptoms?                                                                                                                                   | dropdown   | 0, No 1, Yes                              |
| test_1_days         | How many days did it take to get your results?                                                                                                                                 | text       |                                           |
| test_1_work         | Did you work while waiting for results?                                                                                                                                        | dropdown   | 0, No 1, Yes                              |
| test_1_result       | Result of test                                                                                                                                                                 | dropdown   | 0, Negative 1, Positive 2, Don't know     |
| test_2_loc          | Where did you get access to testing?                                                                                                                                           | dropdown   | 0, Workplace 1, Medical Provider 2, Other |
| test_2_type         | Was it a blood test?                                                                                                                                                           | dropdown   | 0, No 1, Yes                              |
| test_2_symp__0      | In the month before testing or two months after testing, did you have any of the following symptoms? (choice=Cough (new onset or worsening of chronic cough))                  | checkbox   | 0, Unchecked 1, Checked                   |
| test_2_symp__1      | In the month before testing or two months after testing, did you have any of the following symptoms? (choice=Headache)                                                         | checkbox   | 0, Unchecked 1, Checked                   |
| test_2_symp__2      | In the month before testing or two months after testing, did you have any of the following symptoms? (choice=Muscle pain)                                                      | checkbox   | 0, Unchecked 1, Checked                   |
| test_2_symp__3      | In the month before testing or two months after testing, did you have any of the following symptoms? (choice=Fever/feverish)                                                   | checkbox   | 0, Unchecked 1, Checked                   |
| test_2_symp__4      | In the month before testing or two months after testing, did you have any of the following symptoms? (choice=New loss of smell/taste)                                          | checkbox   | 0, Unchecked 1, Checked                   |
| test_2_symp__5      | In the month before testing or two months after testing, did you have any of the following symptoms? (choice=Chills)                                                           | checkbox   | 0, Unchecked 1, Checked                   |
| test_2_symp__6      | In the month before testing or two months after testing, did you have any of the following symptoms? (choice=Difficulty breathing)                                             | checkbox   | 0, Unchecked 1, Checked                   |
| test_2_symp__7      | In the month before testing or two months after testing, did you have any of the following symptoms? (choice=Sore throat)                                                      | checkbox   | 0, Unchecked 1, Checked                   |
| test_2_symp__8      | In the month before testing or two months after testing, did you have any of the following symptoms? (choice=Diarrhea (3 or more loose/looser than normal stools/24hr period)) | checkbox   | 0, Unchecked 1, Checked                   |
| test_2_symp__9      | In the month before testing or two months after testing, did you have any of the following symptoms? (choice=Other)                                                            | checkbox   | 0, Unchecked 1, Checked                   |
| test_2_symp__10     | In the month before testing or two months after testing, did you have any of the following symptoms? (choice=None)                                                             | checkbox   | 0, Unchecked 1, Checked                   |
| test_2_symp_work    | If yes, did you go to work while feeling these symptoms?                                                                                                                       | dropdown   | 0, No 1, Yes                              |
| test_2_symp_spec    | Please specify why you went to work:                                                                                                                                           | text       |                                           |
| test_2_symp_care    | Did you seek medical care for your symptoms?                                                                                                                                   | dropdown   | 0, No 1, Yes                              |
| test_2_days         | How many days did it take to get your results?                                                                                                                                 | text       |                                           |
| test_2_work         | Did you work while waiting for results?                                                                                                                                        | dropdown   | 0, No 1, Yes                              |
| test_2_result       | Result of test                                                                                                                                                                 | dropdown   | 0, Negative 1, Positive 2, Don't know     |
| test_3_loc          | Where did you get access to testing?                                                                                                                                           | dropdown   | 0, Workplace 1, Medical Provider 2, Other |
| test_3_type         | Was it a blood test?                                                                                                                                                           | dropdown   | 0, No 1, Yes                              |
| test_3_symp__0      | In the month before testing or two months after testing, did you have any of the following symptoms? (choice=Cough (new onset or worsening of chronic cough))                  | checkbox   | 0, Unchecked 1, Checked                   |
| test_3_symp__1      | In the month before testing or two months after testing, did you have any of the following symptoms? (choice=Headache)                                                         | checkbox   | 0, Unchecked 1, Checked                   |
| test_3_symp__2      | In the month before testing or two months after testing, did you have any of the following symptoms? (choice=Muscle pain)                                                      | checkbox   | 0, Unchecked 1, Checked                   |
| test_3_symp__3      | In the month before testing or two months after testing, did you have any of the following symptoms? (choice=Fever/feverish)                                                   | checkbox   | 0, Unchecked 1, Checked                   |
| test_3_symp__4      | In the month before testing or two months after testing, did you have any of the following symptoms? (choice=New loss of smell/taste)                                          | checkbox   | 0, Unchecked 1, Checked                   |





|                    |                                                                                                                                                                                |          |                                                                                                                                                                              |
|--------------------|--------------------------------------------------------------------------------------------------------------------------------------------------------------------------------|----------|------------------------------------------------------------------------------------------------------------------------------------------------------------------------------|
| test_9_symp_care   | Did you seek medical care for your symptoms?                                                                                                                                   | dropdown | 0, No 1, Yes                                                                                                                                                                 |
| test_9_days        | How many days did it take to get your results?                                                                                                                                 | text     |                                                                                                                                                                              |
| test_9_work        | Did you work while waiting for results?                                                                                                                                        | dropdown | 0, No 1, Yes                                                                                                                                                                 |
| test_9_result      | Result of test                                                                                                                                                                 | dropdown | 0, Negative 1, Positive 2, Don't know                                                                                                                                        |
| test_10_loc        | Where did you get access to testing?                                                                                                                                           | dropdown | 0, Workplace 1, Medical Provider 2, Other                                                                                                                                    |
| test_10_type       | Was it a blood test?                                                                                                                                                           | dropdown | 0, No 1, Yes                                                                                                                                                                 |
| test_10_symp__0    | In the month before testing or two months after testing, did you have any of the following symptoms? (choice=Cough (new onset or worsening of chronic cough))                  | checkbox | 0, Unchecked 1, Checked                                                                                                                                                      |
| test_10_symp__1    | In the month before testing or two months after testing, did you have any of the following symptoms? (choice=Headache)                                                         | checkbox | 0, Unchecked 1, Checked                                                                                                                                                      |
| test_10_symp__2    | In the month before testing or two months after testing, did you have any of the following symptoms? (choice=Muscle pain)                                                      | checkbox | 0, Unchecked 1, Checked                                                                                                                                                      |
| test_10_symp__3    | In the month before testing or two months after testing, did you have any of the following symptoms? (choice=Fever/feverish)                                                   | checkbox | 0, Unchecked 1, Checked                                                                                                                                                      |
| test_10_symp__4    | In the month before testing or two months after testing, did you have any of the following symptoms? (choice=New loss of smell/taste)                                          | checkbox | 0, Unchecked 1, Checked                                                                                                                                                      |
| test_10_symp__5    | In the month before testing or two months after testing, did you have any of the following symptoms? (choice=Chills)                                                           | checkbox | 0, Unchecked 1, Checked                                                                                                                                                      |
| test_10_symp__6    | In the month before testing or two months after testing, did you have any of the following symptoms? (choice=Difficulty breathing)                                             | checkbox | 0, Unchecked 1, Checked                                                                                                                                                      |
| test_10_symp__7    | In the month before testing or two months after testing, did you have any of the following symptoms? (choice=Sore throat)                                                      | checkbox | 0, Unchecked 1, Checked                                                                                                                                                      |
| test_10_symp__8    | In the month before testing or two months after testing, did you have any of the following symptoms? (choice=Diarrhea (3 or more loose/looser than normal stools/24hr period)) | checkbox | 0, Unchecked 1, Checked                                                                                                                                                      |
| test_10_symp__9    | In the month before testing or two months after testing, did you have any of the following symptoms? (choice=Other)                                                            | checkbox | 0, Unchecked 1, Checked                                                                                                                                                      |
| test_10_symp__10   | In the month before testing or two months after testing, did you have any of the following symptoms? (choice=None)                                                             | checkbox | 0, Unchecked 1, Checked                                                                                                                                                      |
| test_10_symp_work  | If yes, did you go to work while feeling these symptoms?                                                                                                                       | dropdown | 0, No 1, Yes                                                                                                                                                                 |
| test_10_symp_care  | Did you seek medical care for your symptoms?                                                                                                                                   | dropdown | 0, No 1, Yes                                                                                                                                                                 |
| test_10_days       | How many days did it take to get your results?                                                                                                                                 | text     |                                                                                                                                                                              |
| test_10_work       | Did you work while waiting for results?                                                                                                                                        | dropdown | 0, No 1, Yes                                                                                                                                                                 |
| test_10_result     | Result of test                                                                                                                                                                 | dropdown | 0, Negative 1, Positive 2, Don't know                                                                                                                                        |
| test_pos           | If tested positive, how were you told?                                                                                                                                         | radio    | 0, My supervisor 1, I called 2, Health department 3, My doctor 4, Don't remember 5, Other                                                                                    |
| test_infect_loc    | Where do you think you were infected?                                                                                                                                          | radio    | 0, Home 1, Work 2, Community 3, I don't know 4, Skip 0, Stay home and isolate 1, Continue to work 2, No instruction provided 3, Other "Administrative"   "Client engagement" |
| test_pos_instruc   | What did management tell you to do after you were diagnosed?                                                                                                                   | radio    |                                                                                                                                                                              |
| job_cat            | Job Category                                                                                                                                                                   | string   |                                                                                                                                                                              |
| we_hours           | On average, how many hours do you work in a week at this shelter?                                                                                                              | text     |                                                                                                                                                                              |
| we_years           | How long have you worked at this shelter? Years:                                                                                                                               | text     |                                                                                                                                                                              |
| we_months          | months:                                                                                                                                                                        | dropdown |                                                                                                                                                                              |
| we_sick_leave      | Do you have paid sick leave at this job?                                                                                                                                       | dropdown | 0, No 1, Yes                                                                                                                                                                 |
| we_other_job       | Do you have another job besides this one?                                                                                                                                      | dropdown | 0, No 1, Yes                                                                                                                                                                 |
| we_clothcov        | Did you wear a reusable face covering (for example, made of cloth) at work?                                                                                                    | radio    | 0, All of the time 1, Most of the time 2, Sometimes 3, Rarely/never                                                                                                          |
| we_mask            | Did you wear a disposable mask at work?                                                                                                                                        | radio    | 0, All of the time 1, Most of the time 2, Sometimes 3, Rarely/never                                                                                                          |
| we_resitems        | Did you touch residents' belongings or shared items (e.g., mats, linens, laundry)?                                                                                             | dropdown | 0, No 1, Yes                                                                                                                                                                 |
| we_resitems_gloves | If yes, did you wear gloves while touching residents' belongings and shared items?                                                                                             | dropdown | 0, No 1, Yes                                                                                                                                                                 |
| we_contactres      | Did you have close contact (less than 6 feet for more than 15 minutes at a time) or direct physical contact (e.g., touching) with residents?                                   | dropdown | 0, No 1, Yes                                                                                                                                                                 |
| we_ccres_avg       | On average, how often were you in close contact (less than 6 feet for more than 15 minutes at a time) with residents?                                                          | radio    | 0, Never 1, Rarely 2, A few times a month 3, A few times a week 4, A few times a day                                                                                         |
| we_clothcov_ccres  | During those close contacts (less than 6 feet for more than 15 minutes at a time), how often did you wear a reusable face covering?                                            | radio    | 0, All of the time 1, Most of the time 2, Sometimes 3, Rarely/never 4, Don't remember                                                                                        |
| we_mask_ccres      | During those close contacts (less than 6 feet for more than 15 minutes at a time), how often did you wear a disposable mask?                                                   | radio    | 0, All of the time 1, Most of the time 2, Sometimes 3, Rarely/never 4, Don't remember                                                                                        |
| we_clothcov_ccres2 | During those close contacts (less than 6 feet for more than 15 minutes at a time), how often did the residents wear a reusable face covering?                                  | radio    | 0, All of the time 1, Most of the time 2, Sometimes 3, Rarely/never 4, Don't remember                                                                                        |
| we_mask_ccres2     | During those close contacts (less than 6 feet for more than 15 minutes at a time), how often did the residents wear a disposable mask?                                         | radio    | 0, All of the time 1, Most of the time 2, Sometimes 3, Rarely/never 4, Don't remember                                                                                        |
| we_dirphys_res     | On average, how often were you in direct physical contact (e.g., touching) with residents?                                                                                     | radio    | 0, Never 1, Rarely 2, A few times a month 3, A few times a week 4, A few times a day                                                                                         |
| we_dirphys_gloves  | During those direct physical contacts (e.g., touching), how often did you wear gloves?                                                                                         | radio    | 0, All of the time 1, Most of the time 2, Sometimes 3, Rarely/never 4, Don't remember                                                                                        |
| we_ccco            | How often were you in close contact (less than 6 feet for more than 15 minutes at a time) with your co-workers?                                                                | radio    | 0, Never 1, Rarely 2, A few times a month 3, A few times a week 4, A few times a day                                                                                         |
| we_clothcov_ccco   | Did you wear facial coverings when in close contact (less than 6 feet for more than 15 minutes at a time) with your co-workers?                                                | dropdown | 0, No 1, Yes                                                                                                                                                                 |
| c19_cc             | Were you in close contact (less than 6 feet for more than 15 minutes at a time) with a person who had COVID-19?                                                                | dropdown | 0, No 1, Yes 2, Don't know                                                                                                                                                   |
| c19_cc_exp__0      | Where were you in contact with a person with COVID-19 (select all that apply)? (choice=Home)                                                                                   | checkbox | 0, Unchecked 1, Checked                                                                                                                                                      |
| c19_cc_exp__1      | Where were you in contact with a person with COVID-19 (select all that apply)? (choice=Work)                                                                                   | checkbox | 0, Unchecked 1, Checked                                                                                                                                                      |
| c19_cc_exp__2      | Where were you in contact with a person with COVID-19 (select all that apply)? (choice=Community)                                                                              | checkbox | 0, Unchecked 1, Checked                                                                                                                                                      |
| c19_cc_exp__3      | Where were you in contact with a person with COVID-19 (select all that apply)? (choice=I don't know)                                                                           | checkbox | 0, Unchecked 1, Checked                                                                                                                                                      |
| c19_cc_mask        | Did you wear a disposable mask when interacting with the person who had COVID-19?                                                                                              | radio    | 0, Never 1, Sometimes 2, Most times 3, Always 4, Don't remember                                                                                                              |
| c19_cc_ppe__0      | Did you use any other PPE (personal protective equipment) when interacting with the person who had COVID-19 (select all that apply)? (choice=Gloves)                           | checkbox | 0, Unchecked 1, Checked                                                                                                                                                      |
| c19_cc_ppe__1      | Did you use any other PPE (personal protective equipment) when interacting with the person who had COVID-19 (select all that apply)? (choice=Gown)                             | checkbox | 0, Unchecked 1, Checked                                                                                                                                                      |
| c19_cc_ppe__2      | Did you use any other PPE (personal protective equipment) when interacting with the person who had COVID-19 (select all that apply)? (choice=Respirator (N-95))                | checkbox | 0, Unchecked 1, Checked                                                                                                                                                      |
| c19_cc_ppe__3      | Did you use any other PPE (personal protective equipment) when interacting with the person who had COVID-19 (select all that apply)? (choice=None)                             | checkbox | 0, Unchecked 1, Checked                                                                                                                                                      |
| c19_cc_ppe__4      | Did you use any other PPE (personal protective equipment) when interacting with the person who had COVID-19 (select all that apply)? (choice=Other)                            | checkbox | 0, Unchecked 1, Checked                                                                                                                                                      |
| c19_cc_ppe_other   | Describe "other":                                                                                                                                                              | text     |                                                                                                                                                                              |
| c19_infect         | Have you felt worried about being infected with COVID-19 because of your job?                                                                                                  | dropdown | 0, No 1, Yes 2, Skip                                                                                                                                                         |
| c19_infect_quit    | Did you think of quitting your job because you were worried?                                                                                                                   | dropdown | 0, No 1, Yes 2, Skip                                                                                                                                                         |
| home_famsup        | Is your family supportive of your work?                                                                                                                                        | dropdown | 0, No 1, Yes 2, Unknown 3, Skip                                                                                                                                              |
| home_risk_you      | Did your family/friends feel you were at increased risk of being infected with COVID-19 due to the nature of your work?                                                        | dropdown | 0, No 1, Yes                                                                                                                                                                 |
| home_risk_fam      | Did you feel they (your friends/family) were at increased risk of being infected with COVID-19 due to the nature of your work?                                                 | dropdown | 0, No 1, Yes                                                                                                                                                                 |

|               |                                                                                                                            |          |                                    |
|---------------|----------------------------------------------------------------------------------------------------------------------------|----------|------------------------------------|
| ipc_educ      | Do you have any formal health education (i.e., medical school, nursing school, medical assistant school, behavioral        | dropdown | 0, No 1, Yes 2, Other              |
| ipc_clean     | Did you perform cleaning activities in your normal job?                                                                    | dropdown | 0, No 1, Yes                       |
| ipc_clean_c19 | Were you trained on how to clean an area after a resident diagnosed with COVID-19 leaves the shelter?                      | dropdown | 0, No 1, Yes                       |
| ipc_resp___0  | What did your facility do in response to the COVID-19 outbreak (select all that apply)? (choice=Increased handwashing      | checkbox | 0, Unchecked 1, Checked            |
| ipc_resp___1  | What did your facility do in response to the COVID-19 outbreak (select all that apply)? (choice=Safe distancing (more than | checkbox | 0, Unchecked 1, Checked            |
| ipc_resp___2  | What did your facility do in response to the COVID-19 outbreak (select all that apply)? (choice=Cloth face coverings for   | checkbox | 0, Unchecked 1, Checked            |
| ipc_resp___3  | What did your facility do in response to the COVID-19 outbreak (select all that apply)? (choice=Provision of PPE (personal | checkbox | 0, Unchecked 1, Checked            |
| ipc_resp___4  | What did your facility do in response to the COVID-19 outbreak (select all that apply)? (choice=Nothing                    | checkbox | 0, Unchecked 1, Checked            |
| ipc_act_agree | Do you agree with how your organization responded to the outbreak?                                                         | dropdown | 0, No 1, Yes 2, Don't know 3, Skip |
